# Supplementary material
Source: ML conference proceedings conference paper supplement (https://openreview.net/forum?id=B5UfWd8iqlc)
Supplement: supplementary_material [file attachment]

| Frame                  | t-1                                                                                              | t                                                                                                |
|------------------------|--------------------------------------------------------------------------------------------------|--------------------------------------------------------------------------------------------------|
| Case 1<br>(Success)    |                 |                 |
| Case 2<br>(Undetected) |  <span>?</span> |  <span>?</span> |
| Case 3<br>(Missing)    |                 |                 |
| Case 4<br>(Appear)     |                                                                                                  |                 |
| Case 5<br>(Disappear)  |                 |                                                                                                  |
| Case 6<br>(FP)         |                |                |

Event Categorization Table

| <div> <div>t-1</div> <div>t</div> </div> | GT – O<br>Det – O | GT – O<br>Det – X | GT – X<br>Det – X | GT – X<br>Det – O |
|------------------------------------------|-------------------|-------------------|-------------------|-------------------|
| GT – O<br>Det – O                        | (1) Success       | (3) Missing       | (5) Disappear     | (6) FP            |
| GT – O<br>Det – X                        | (2) Undetected    | (2) Undetected    | (2) Undetected    | (6) FP            |
| GT – X<br>Det – X                        | (4) Appear        | (2) Undetected    | None              | (6) FP            |
| GT – X<br>Det – O                        | (6) FP            | (6) FP            | (6) FP            | (6) FP            |

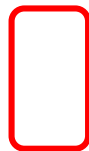

GT box

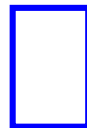

Detection box
