# Supplementary material
Source: ML conference proceedings conference paper supplement (https://openreview.net/forum?id=B5UfWd8iqlc)
Supplement: supplementary_material [file attachment]

**Detections (t)**

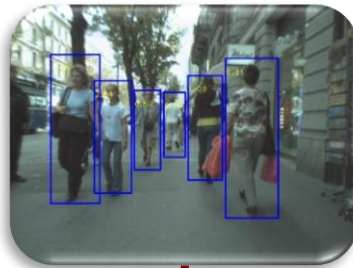

**Tracked Targets (t-1)**

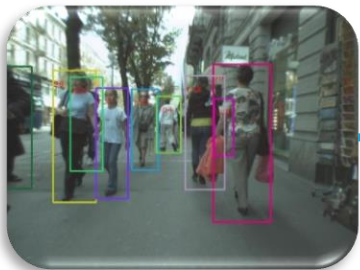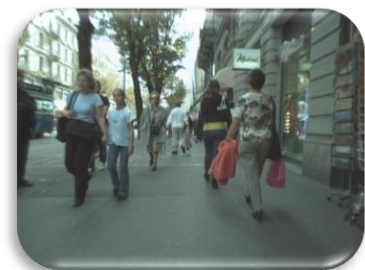

**Input Image Frame**

**R-FCN  
(SqueezeNet)**

**Feature Map**

**Tracking  
(Kalman  
Filter)**

**Classification**

**Affinity  
Network  
(GoogLeNet)**

**Distance Matrix**

|   |     |      |      |      |
|---|-----|------|------|------|
|   | 1   | 2    | 3    | 4    |
| 1 | 2.6 | 0.11 | 0.2  | 0.4  |
| 2 | 0.1 | 3.8  | 0.15 | 0    |
| 3 | 0   | 0.2  | 0.25 | 0.2  |
| 4 | 0   | 0.12 | 0.16 | 0.42 |

**DHN**

**Answer  
Sheet**

|   |     |     |     |     |
|---|-----|-----|-----|-----|
|   | 1   | 2   | 3   | 4   |
| 1 | 0.8 | 0.2 | 0   | 0.1 |
| 2 | 0.1 | 0.9 | 0.1 | 0   |
| 3 | 0.1 | 0.2 | 0.2 | 0.1 |
| 4 | 0.1 | 0.1 | 0   | 0.2 |

**Association Matrix**

**Detections (t)**

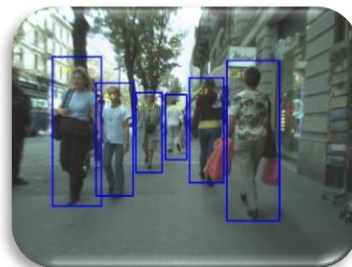

**Tracked Targets (t-1)**

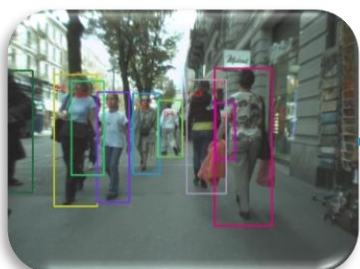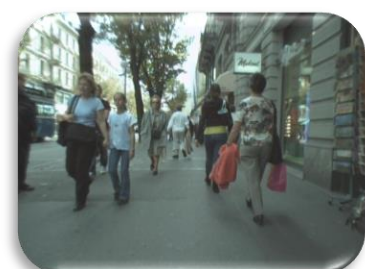

**Input Image Frame**

**ResNet-101  
(FPN)**

**Feature Map**

**Tracking  
(Regression)**

**Classification  
(Filtering)**

**Affinity  
Network  
(Siamese  
CNN)**

**Distance Matrix**

|   | 1   | 2    | 3    | 4    |
|---|-----|------|------|------|
| 1 | 2.6 | 0.11 | 0.2  | 0.4  |
| 2 | 0.1 | 3.8  | 0.15 | 0    |
| 3 | 0   | 0.2  | 0.25 | 0.2  |
| 4 | 0   | 0.12 | 0.16 | 0.42 |

**DHN**

**Answer  
Sheet**

|   | 1   | 2   | 3   | 4   |
|---|-----|-----|-----|-----|
| 1 | 0.8 | 0.2 | 0   | 0.1 |
| 2 | 0.1 | 0.9 | 0.1 | 0   |
| 3 | 0.1 | 0.2 | 0.2 | 0.1 |
| 4 | 0.1 | 0.1 | 0   | 0.2 |

**Association Matrix**
