# Supplementary material
Source: ML conference proceedings conference paper supplement (https://openreview.net/forum?id=B5UfWd8iqlc)
Supplement: supplementary_material [file attachment]

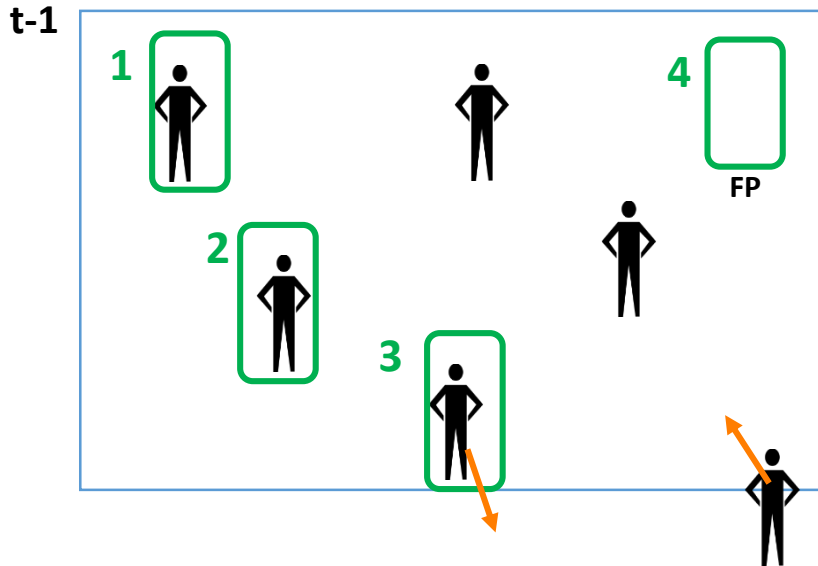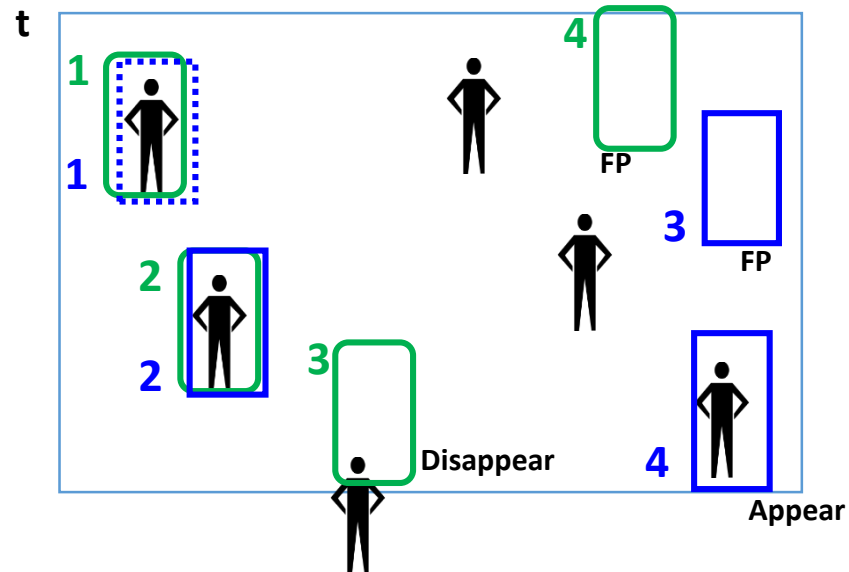

|                     | Det ID ( $j$ ) |   |   |   | FP | Appear |
|---------------------|----------------|---|---|---|----|--------|
| Track ID ( $i$ )    |                | 1 | 2 | 3 | 4  |        |
| Missing - Recovered | 1              | 1 |   | 0 | 0  |        |
| Success             | 2              |   | 1 | 0 | 0  |        |
| Disappeared         | 3              | 0 | 0 | 0 | 0  |        |
| FP                  | 4              | 0 | 0 | 0 | 0  |        |

**G**

Event-Aware GT Association Matrix

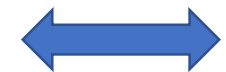

Event-Aware Loss

|                  | Det ID ( $j$ ) |     |     |     |   |
|------------------|----------------|-----|-----|-----|---|
| Track ID ( $i$ ) |                | 1   | 2   | 3   | 4 |
| 1                | 0.8            | 0.2 | 0   | 0.1 |   |
| 2                | 0.1            | 0.9 | 0.1 | 0   |   |
| 3                | 0.1            | 0.2 | 0.2 | 0.1 |   |
| 4                | 0.1            | 0.1 | 0   | 0.2 |   |

**A**

Output Association Matrix

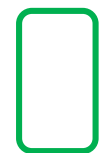

Track box

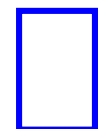

Detection box
