# Supplementary material
Source: ML conference proceedings conference paper supplement (https://openreview.net/forum?id=B5UfWd8iqlc)
Supplement: supplementary_material [file attachment]

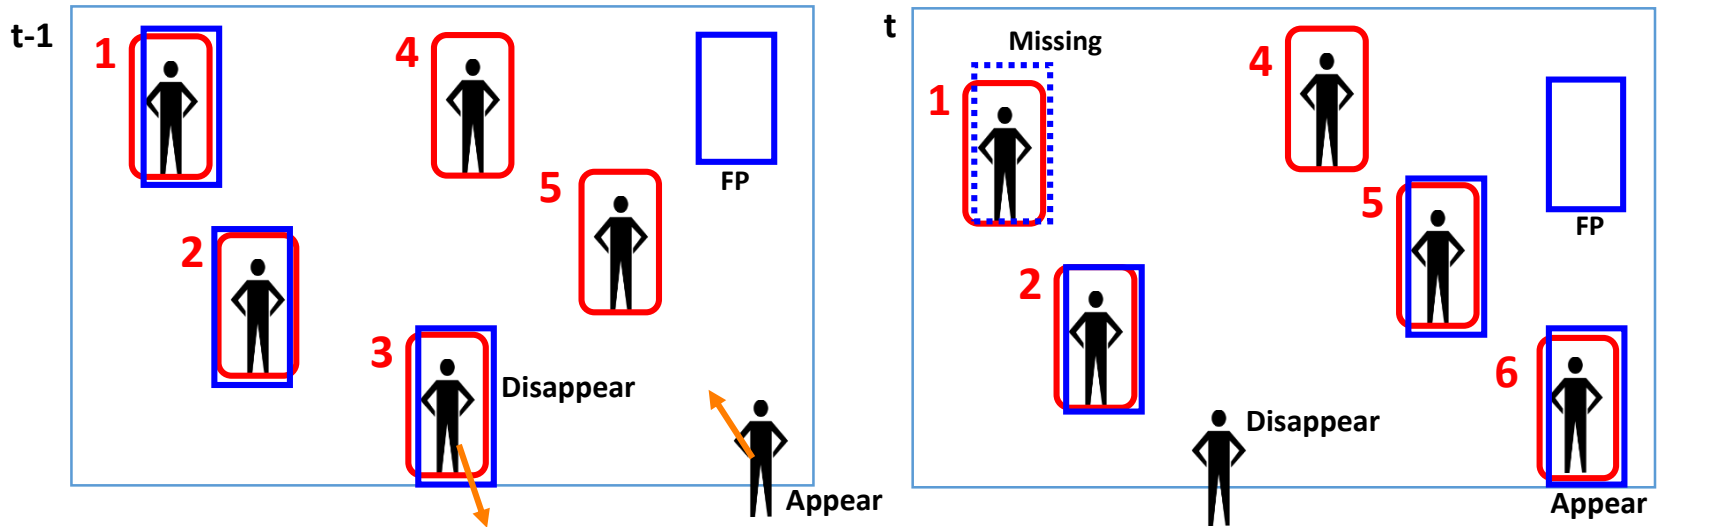

Target State Table

| ID           | 1                 | 2                 | 3                 | 4                 | 5                 | 6                 | 7 (FP)            |
|--------------|-------------------|-------------------|-------------------|-------------------|-------------------|-------------------|-------------------|
| <b>t-1</b>   | GT – O<br>Det – O | GT – O<br>Det – O | GT – O<br>Det – O | GT – O<br>Det – X | GT – O<br>Det – X | GT – X<br>Det – X | GT – X<br>Det – O |
| <b>t</b>     | GT – O<br>Det – X | GT – O<br>Det – O | GT – X<br>Det – X | GT – O<br>Det – X | GT – O<br>Det – O | GT – X<br>Det – O | GT – X<br>Det – O |
| <b>Event</b> | Missing           | Success           | Disappear         | Undetected        | Undetected        | Appear            | FP                |
